# Supplementary material
Source: publisher site journal article supplement (https://www.kjim.org/upload/media/kjim-2022-072-suppl9.pdf)
Supplement: Supplementary file 1 [file kjim-2022-072-suppl9.pdf]

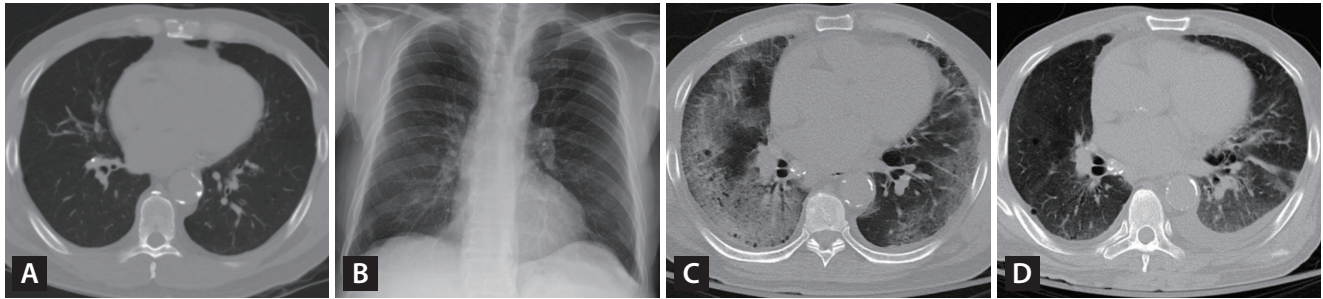

**Supplementary Figure 5.** Radiologic findings of patient #6 before and after coronavirus disease 2019 (COVID-19) vaccination (first dose of ChAdOx1 nCoV-19 vaccine). (A) Ten months prior to onset. (B) Three months prior to onset. (C) COVID-19 vaccine-related pneumonitis (CV-P). (D) Two months after CV-P.
